# Supplementary material
Source: PubMed Central journal article supplement (PMC2077282)

A

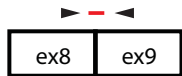

WT relative to HPRT

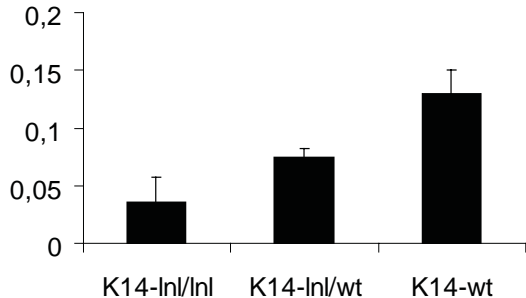

B

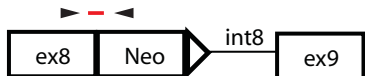

splice variant relative to HPRT

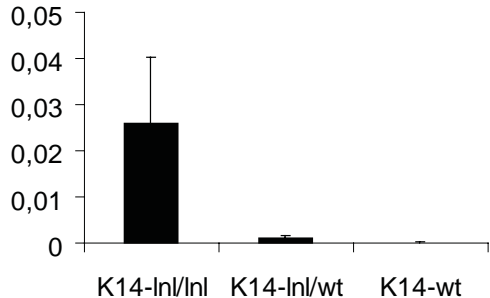

Supplement: pnas_0708086104_1.pdf [file pnas_0708086104_1.pdf]

K14-wt

K14-In1/In1

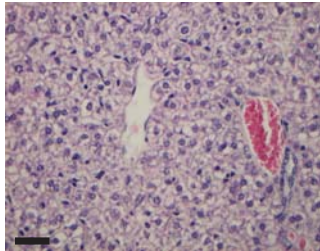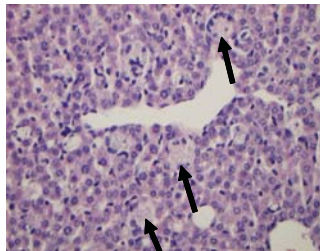

Liver

K14-wt

K14-In1/In1

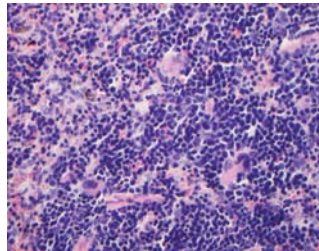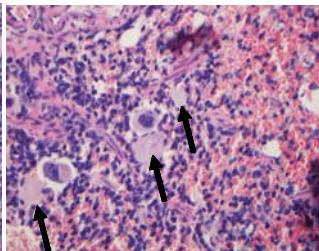

Spleen

Supplement: pnas_0708086104_2.pdf [file pnas_0708086104_2.pdf]

control

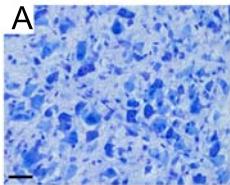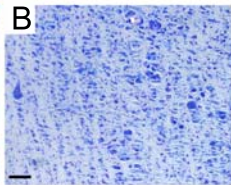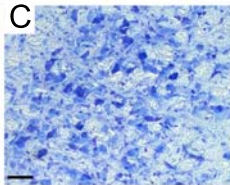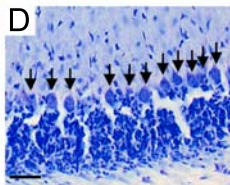

K14-Inl-Inl

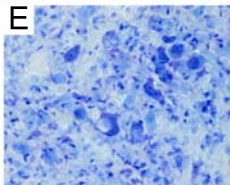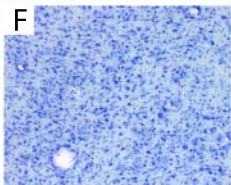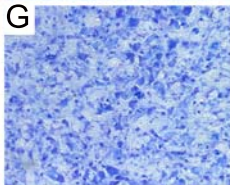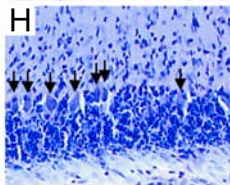

Supplement: pnas_0708086104_3.pdf [file pnas_0708086104_3.pdf]

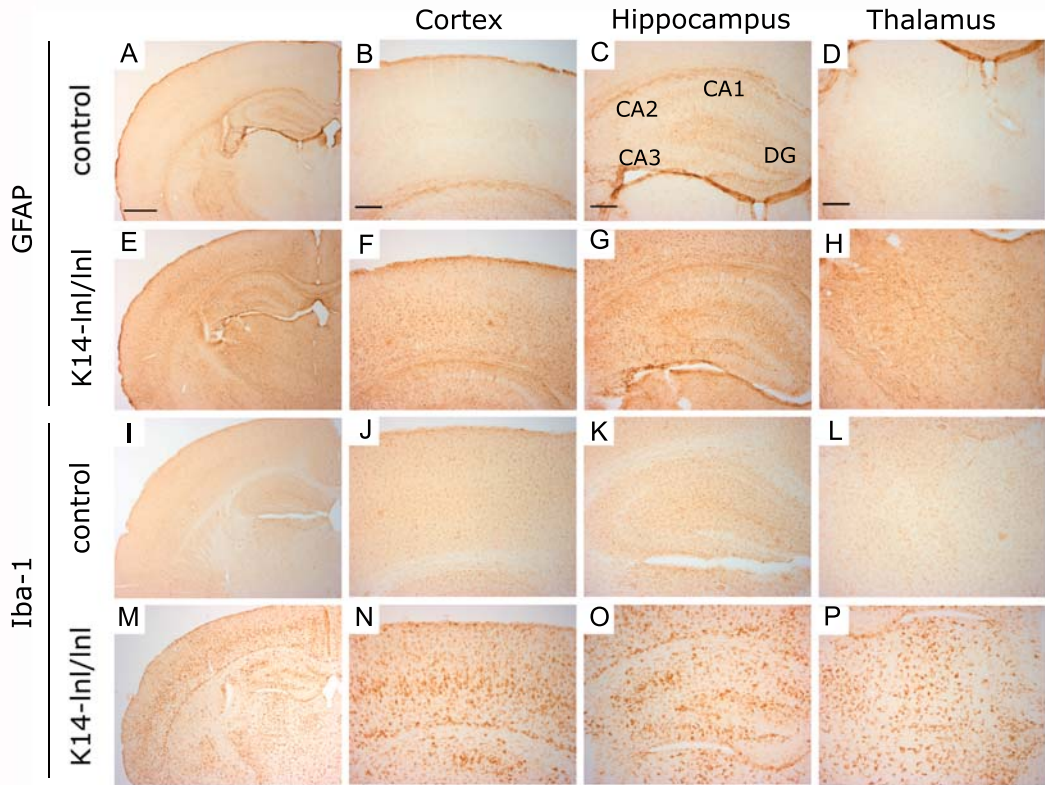

Supplement: pnas_0708086104_4.pdf [file pnas_0708086104_4.pdf]

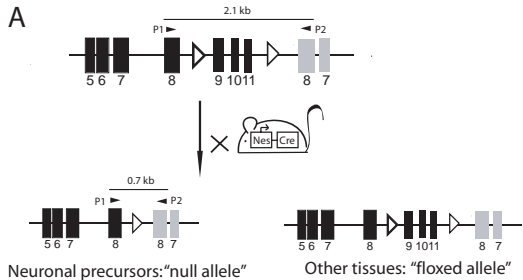

**B**

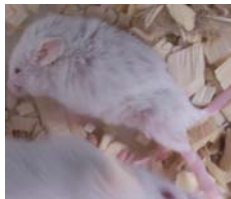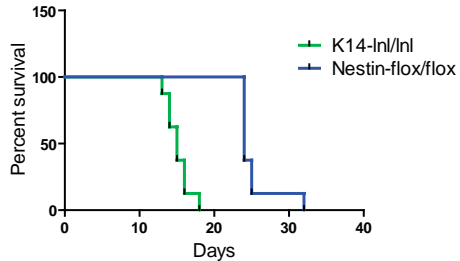

**C**

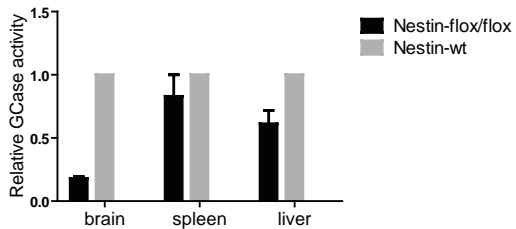

**D**

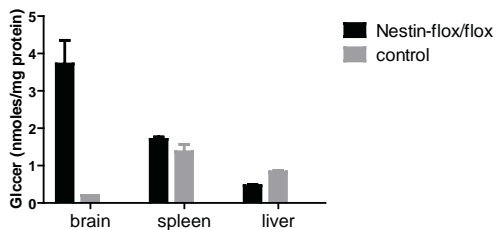

Supplement: pnas_0708086104_5.pdf [file pnas_0708086104_5.pdf]
